# Supplementary material for: Multidimensional fluorescence studies of the phenolic content of dissolved organic carbon in humic substances
Source: Royal Society of Chemistry journal article supplement (doi:10.1039/c2em10501b), 2012-01-01
Supplement: c2em10501b.pdf [file c2em10501b.pdf]

Supplemental Material

**Multidimensional Fluorescence Studies of the Phenolic Content of Dissolved Organic Carbon in Humic Substances**

Todd Pagano<sup>1</sup>, Annemarie D. Ross<sup>1</sup>, Joseph Chiarelli<sup>2</sup>, and Jonathan E. Kenny<sup>2</sup>

<sup>1</sup>Department of Science & Mathematics, Laboratory Science Technology program. Rochester Institute of Technology/National Technical Institute for the Deaf, Rochester, NY

<sup>2</sup>Department of Chemistry, Tufts University, Medford, MA

## Pahoee Reference IHSS

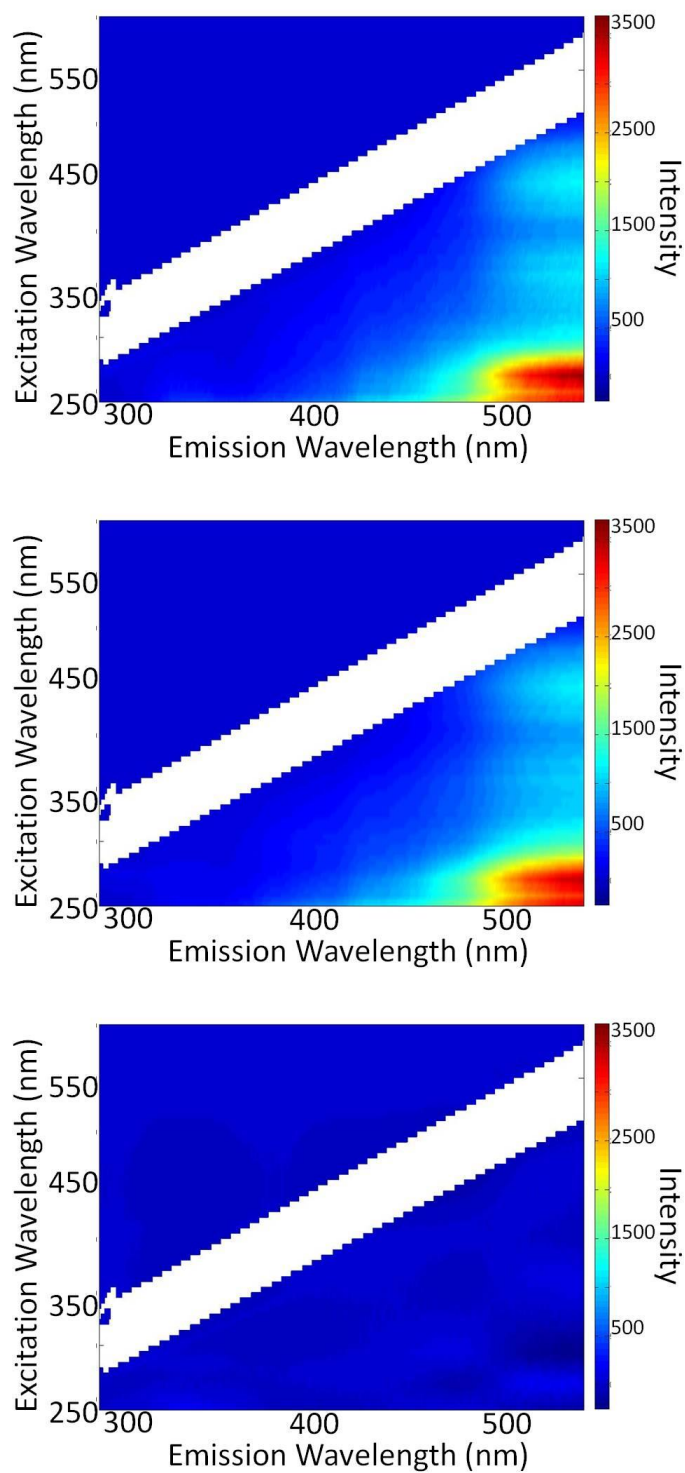

**Figure S1. EEMs of Pahoee Reference IHSS (top to bottom: corrected sample, PARAFAC model, and PARAFAC residual). Intensity scales in relative fluorescence units (for a discussion of fluorescence units, see the Experimental Details section).**

## Pahoee Standard IHSS

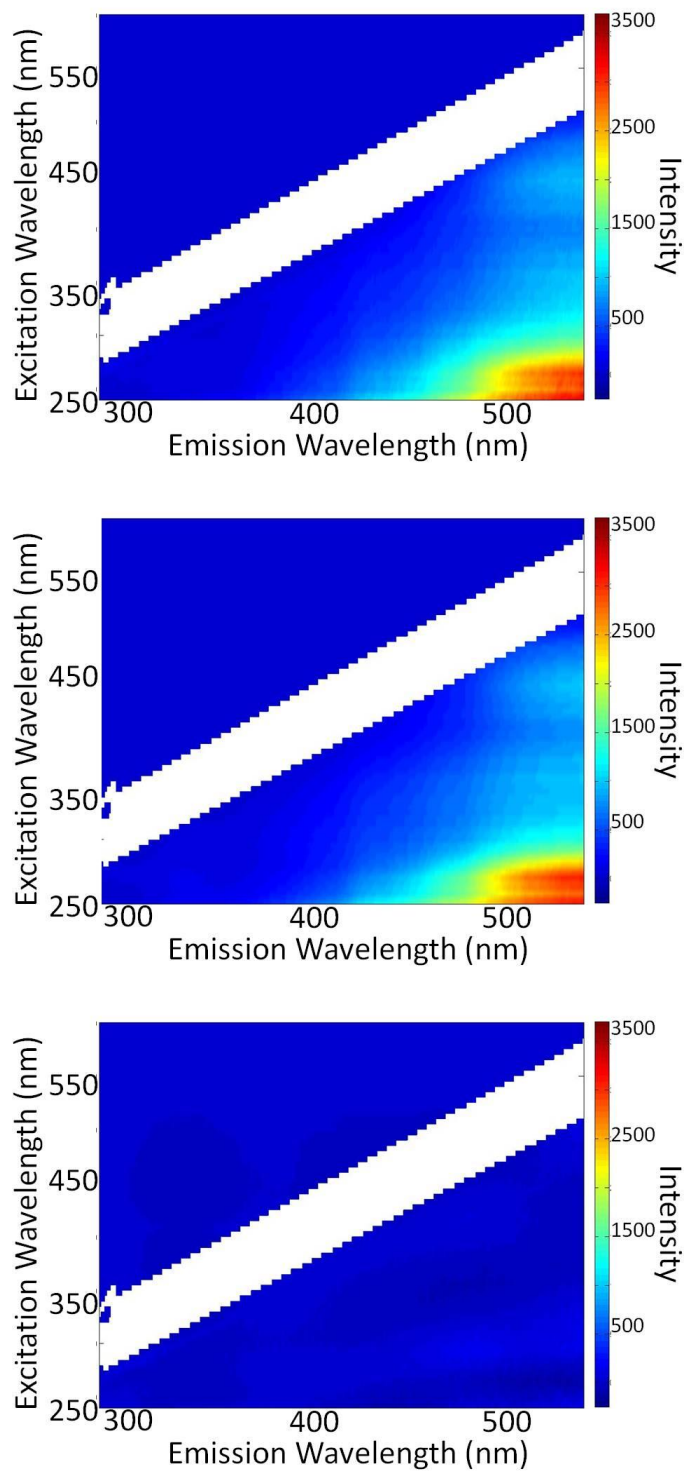

**Figure S2. EEMs of Pahoee Standard IHSS (top to bottom: corrected sample, PARAFAC model, and PARAFAC residual). Intensity scales in relative fluorescence units (for a discussion of fluorescence units, see the Experimental Details section).**

## Nordic IHSS

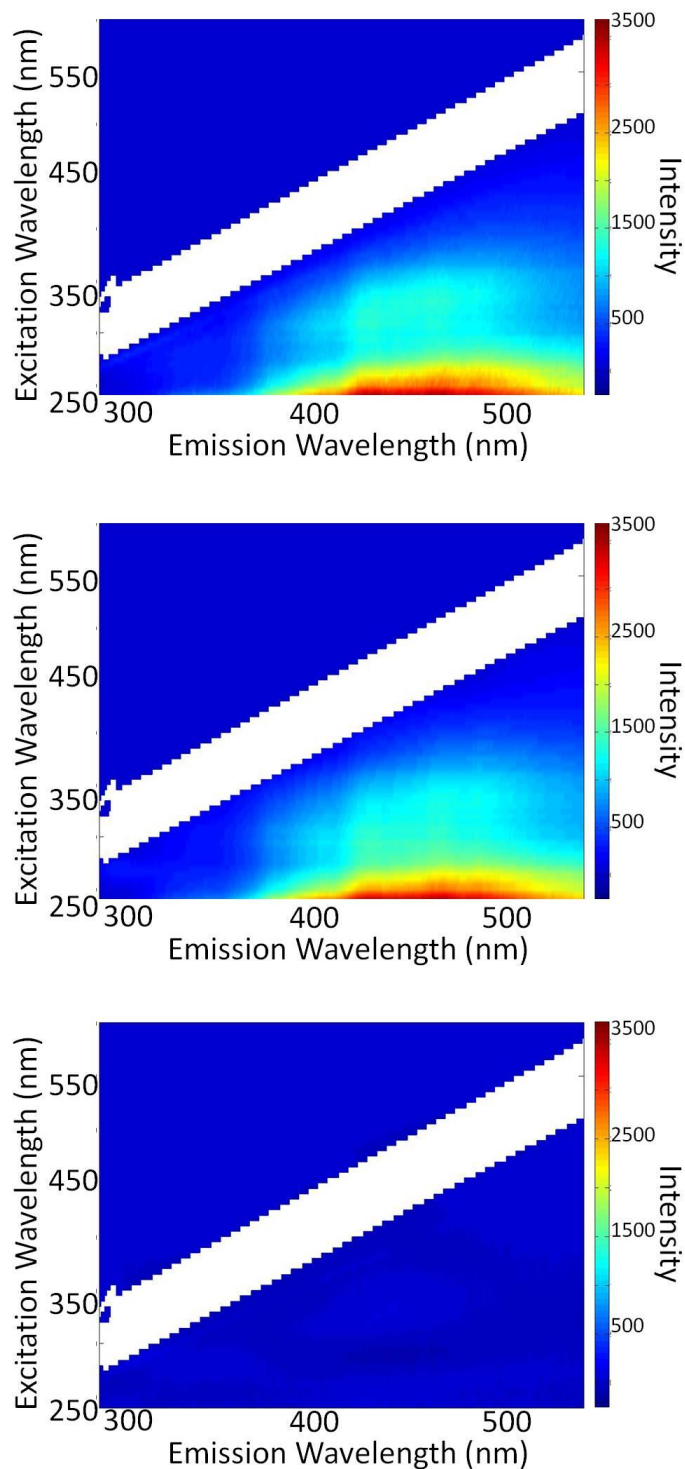

**Figure S3. EEMs of Nordic IHSS (top to bottom: corrected sample, PARAFAC model, and PARAFAC residual). Intensity scales in relative fluorescence units (for a discussion of fluorescence units, see the Experimental Details section). Intensities for the Nordic sample have been multiplied by a factor of 2.**

## Waskish IHSS

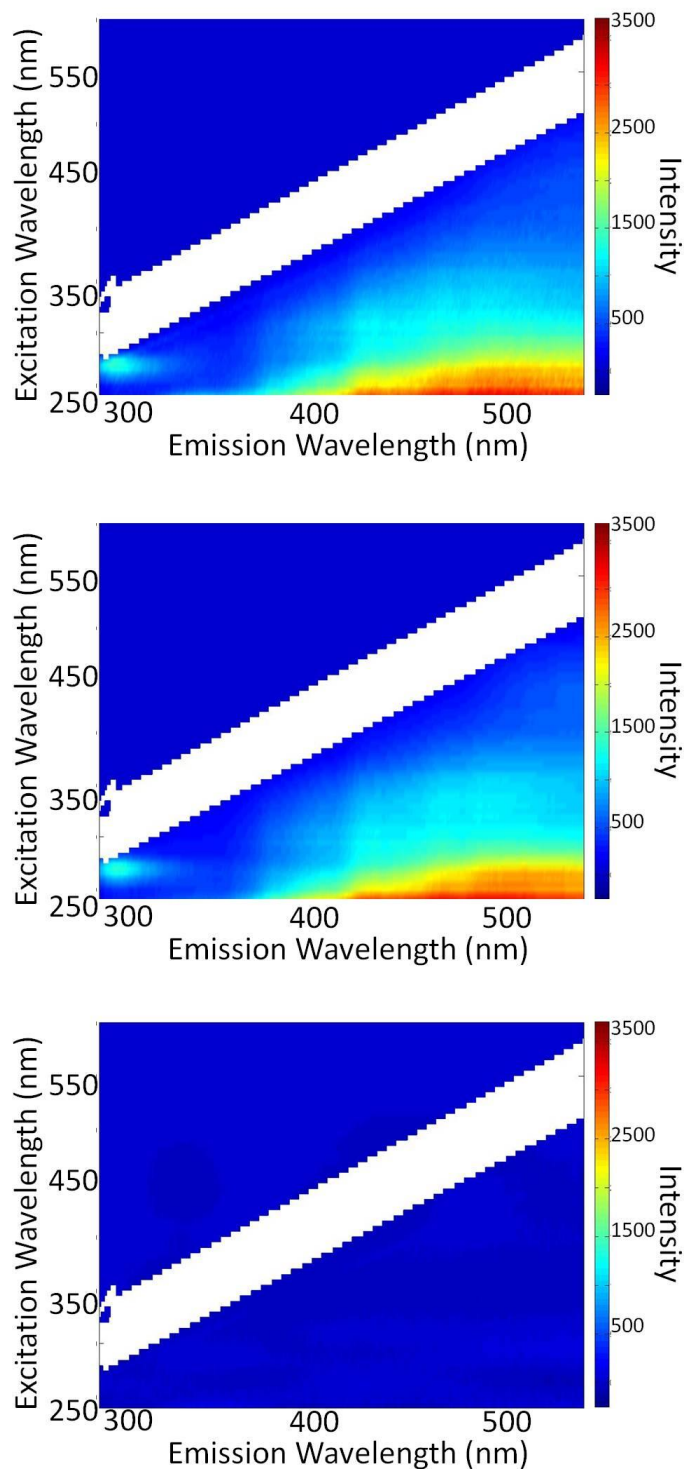

**Figure S4. EEMs of Waskish IHSS (top to bottom: corrected sample, PARAFAC model, and PARAFAC residual). Intensity scales in relative fluorescence units (for a discussion of fluorescence units, see the Experimental Details section). Intensities for the Waskish sample have been multiplied by a factor of 2.**

## Suwannee River IHSS

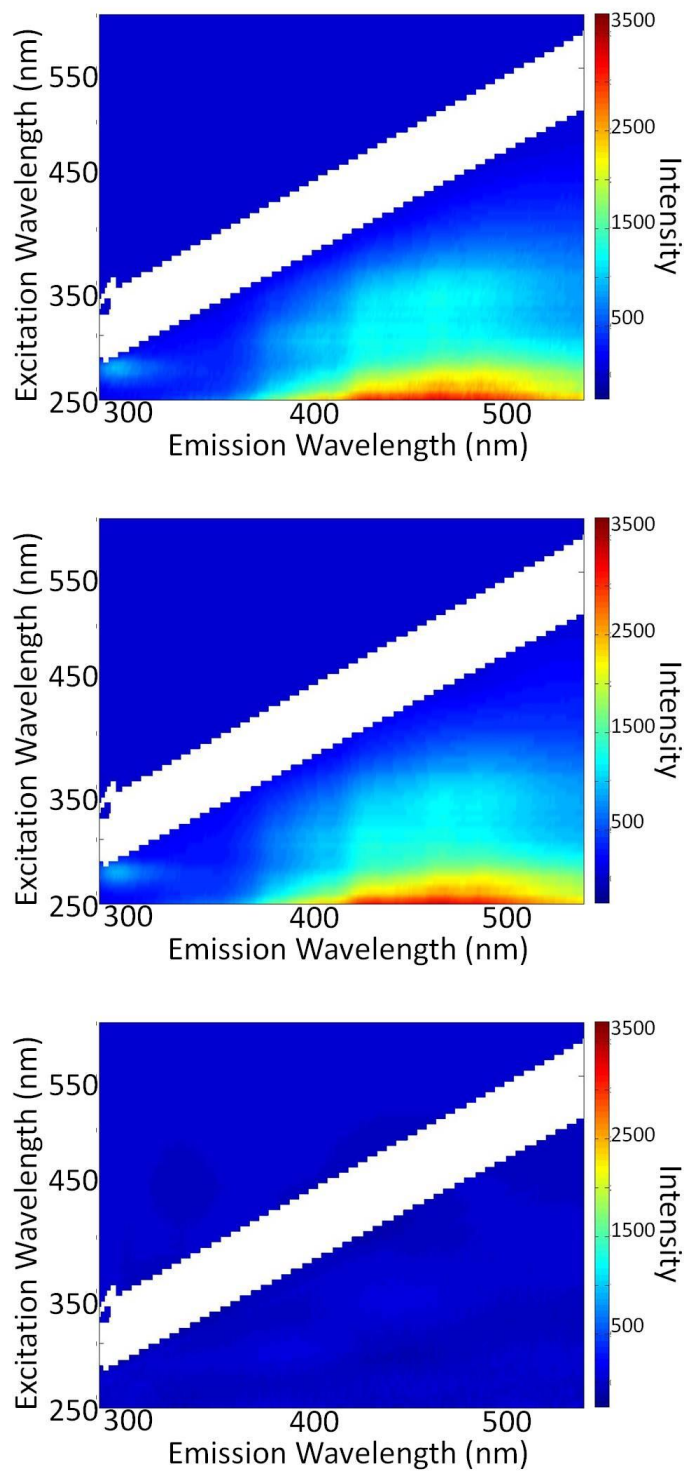

**Figure S5. EEMs of Suwannee River IHSS (top to bottom: corrected sample, PARAFAC model, and PARAFAC residual). Intensity scales in relative fluorescence units (for a discussion of fluorescence units, see the Experimental Details section).**
